# Supplementary material for: Tuning the porosity of lanthanide MOFs with 2,5-pyrazinedicarboxylate and the first in situ hydrothermal carboxyl transfer
Source: Royal Society of Chemistry journal article supplement (doi:10.1039/c0ce00340a), 2010-10-27
Supplement: c0ce00340a.pdf [file c0ce00340a.pdf]

---

## Supporting Information

### Tuning the porosity of lanthanide MOFs with 2,5-pyrazinedicarboxylate and the first in situ hydrothermal carboxyl transfer

5 Bin Cai, Ping Yang, Jing-Wei Dai, Jian-Zhong Wu\*

Received (in XXX, XXX) Xth XXXXXXXXXX 200X, Accepted Xth XXXXXXXXXX 200X

First published on the web Xth XXXXXXXXXX 200X

DOI: 10.1039/b000000x

10 **Table S1** Microanalysis and IR spectral data for complexes  $[\text{Ln}(\text{pzdc})(\text{ox})_{0.5}(\text{H}_2\text{O})_2] \cdot 4.5\text{H}_2\text{O}$  (**1-Ln**; Ln = Nd, Sm, Eu, Gd, Tb, Dy) and  $[\text{Ln}(2,5\text{-pzdc})_{0.5}(2,6\text{-pzdc})(\text{H}_2\text{O})_3]$  (**2-Ln**; Ln = Pr, Sm, Eu, Tb)

---

| Complex     | Microanalysis (%)                             |                                                                                                                                                              | IR band ( $\text{cm}^{-1}$ ) |
|-------------|-----------------------------------------------|--------------------------------------------------------------------------------------------------------------------------------------------------------------|------------------------------|
|             | Calculated                                    | Found                                                                                                                                                        |                              |
| <b>1-Nd</b> | C 17.83 (17.81); H 3.21 (3.15); N 5.94 (5.90) | 3381 s, 1615 s, 1490m, 1406 s, 1316 s, 1187 m, 1046 m, 851 m, 797 m, 775 w, 701 w, 531 w, 484 w                                                              |                              |
| <b>1-Sm</b> | C 17.61 (17.5); H 3.17 (3.10); N 5.87 (5.83)  | 3374 s, 1607 s, 1485 m, 1406 s, 1317 s, 1176 m, 1046 m, 848 m, 799 m, 533 w                                                                                  |                              |
| <b>1-Eu</b> | C 17.55 (17.51); H 3.16 (3.13); N 5.85 (5.79) | 3378 s, 1608 s, 1485 m, 1405 s, 1318 s, 1177 m, 1045 m, 928 w, 847 m, 799 w, 777 w, 534 w, 488 w                                                             |                              |
| <b>1-Gd</b> | C 17.35 (17.34); H 3.12 (3.10); N 5.78 (5.75) | 3445 s, 1605 s, 1486 m, 1387 s, 1320 s, 1178 m, 1046 m, 845 m, 776 w, 522 w                                                                                  |                              |
| <b>1-Tb</b> | C 17.29 (17.22); H 3.11 (3.12); N 5.76 (5.74) | 3328 s, 1608 s, 1486 m, 1408 s, 1319 s, 1177 m, 1045 m, 849 m, 777 w, 537 w, 490 w                                                                           |                              |
| <b>1-Dy</b> | C 17.17 (17.16); H 3.09 (3.07); N 5.72 (5.71) | 3356 s, 1610 s, 1486 m, 1408 s, 1319 s, 1178 m, 1046 m, 850 m, 801 w, 778 w, 539 w, 490 w                                                                    |                              |
| <b>2-Pr</b> | C 24.34 (24.13); H 2.04 (2.12); N 9.46 (9.31) | 3427 s, 1679 m, 1611 s, 1479 w, 1461 w, 1401 s, 1343 w, 1326 m, 1221 w, 1188 m, 1134 m, 1047 m, 944 w, 830 w, 781 w, 752 m, 670 w, 588, w 549 w 513 w, 461 w |                              |
| <b>2-Sm</b> | C 23.62 (23.83); H 2.11 (2.00); N 9.42 (9.27) | 3430 s, 1681 w, 1614 s, 1481 w, 1460 w, 1405 m, 1345 w, 1220 w, 1189 m, 1136 m, 1048 m, 946 m, 909 w, 833 w, 780 w, 751 m, 669 w, 589 w, 551 w, 516 w, 462 w |                              |
| <b>2-Eu</b> | C 23.75 (23.45); H 1.99 (2.09); N 9.23 (9.07) | 3430 s, 1680 m, 1612 s, 1481 w, 1460 w, 1406 s, 1346 w, 1327 m, 1220 w, 1188 m, 1135 m, 1048 m, 946 w, 832 w, 781 w, 751 m, 672 w, 589, w 551 w 516 w, 463 w |                              |
| <b>2-Tb</b> | C 23.39 (23.12); H 1.96 (2.07); N 9.09 (9.21) | 3435 s, 1680 m, 1618 s, 1482 w, 1464 w, 1408 s, 1344 w, 1325 m, 1222 w, 1189 m, 1136 m, 1049 m, 947 w, 831 w, 782 w, 750 m, 674 w, 588, w 554 w 517 w, 463 w |                              |

---
